# Supplementary material for: Vectofusin-1 Promotes RD114-TR-Pseudotyped Lentiviral Vector Transduction of Human HSPCs and T Lymphocytes
Source: PubMed Central journal article supplement — Mol Ther Methods Clin Dev. 2017 Mar 8;5:22–30. doi: 10.1016/j.omtm.2017.02.003 (PMC5415310; doi:10.1016/j.omtm.2017.02.003), 2017-03-08
Supplement: mmc1.pdf [file mmc1.pdf]

**OMTM, Volume 5**

**Supplemental Information**

**Vectofusin-1 Promotes RD114-TR-Pseudotyped**

**Lentiviral Vector Transduction of Human**

**HSPCs and T Lymphocytes**

**Claudia Piovan, Virna Marin, Cinzia Scavullo, Stefano Corna, Erica Giuliani, Sergio Bossi, Anne Galy, David Fenard, Claudio Bordignon, Gian Paolo Rizzardi, and Chiara Bovolenta**

**Table S1: Lack of toxicity of Vectofusin-1 on VSV-G and RD3-MolPack transduced CD34<sup>+</sup> cells**

|                                                                      | VSV-G       |            |              |            | RD3-MolPack |            |              |            |
|----------------------------------------------------------------------|-------------|------------|--------------|------------|-------------|------------|--------------|------------|
|                                                                      | Retronectin |            | Vectofusin-1 |            | Retronectin |            | Vectofusin-1 |            |
|                                                                      | Mock        | Transduced | Mock         | Transduced | Mock        | Transduced | Mock         | Transduced |
| <b>Cord blood derived CD34<sup>+</sup> HSPCs</b>                     |             |            |              |            |             |            |              |            |
| Total colonies (CFU-GM, BFU-E+CFU-E, CFU-GEMM)/10 <sup>6</sup> cells | 1.68E+05    | 2.94E+05   | 1.80E+05     | 3.03E+05   | 1.04E+05    | 1.29E+05   | 1.10E+05     | 1.29E+05   |
| <b>Bone marrow derived CD34<sup>+</sup> HSPCs</b>                    |             |            |              |            |             |            |              |            |
| Total colonies (CFU-GM, BFU-E+CFU-E, CFU-GEMM)/10 <sup>6</sup> cells | 7.25E+04    | 7.92E+04   | 1.15E+05     | 8.04E+04   | 7.25E+04    | 5.88E+04   | 1.15E+05     | 9.00E+04   |

The data derive from a single donor of CB and from the best donor of the three BM CD34<sup>+</sup> HSPCs tested

Table S2: LV supernatant lots

| LOT                                 |           |                         |                                              |                            | Potency         |                     |
|-------------------------------------|-----------|-------------------------|----------------------------------------------|----------------------------|-----------------|---------------------|
|                                     |           |                         | Concentration                                | Titer (TU/ml) <sup>a</sup> | p24 gag (µg/ml) | Infectivity (TU/ng) |
| <b>VSV-G SIN-GFP LV<sup>b</sup></b> | Transient | Cell Factory            | Anion exchange gel filtration chromatography | $2.2 \times 10^8$          | 5.5             | $4.0 \times 10^4$   |
| <b>VSV-G SIN-GFP LV<sup>c</sup></b> | Transient | Cell Factory            | Anion exchange gel filtration chromatography | $3.5 \times 10^8$          | 1.1             | $3.3 \times 10^5$   |
| <b>RD114-TR SIN-GFP LV</b>          | Stable    | Bioreactor <sup>d</sup> |                                              |                            |                 |                     |
| LOT 1 <sup>b</sup>                  |           |                         | High Speed <sup>e</sup>                      | $1.9 \times 10^8$          | 18.1            | $1.0 \times 10^4$   |
| LOT 2 <sup>c</sup>                  |           |                         | Low speed <sup>f</sup>                       | $1.4 \times 10^8$          | 15.7            | $9.2 \times 10^3$   |
| LOT 3 <sup>g</sup>                  |           |                         | High Speed                                   | $5.5 \times 10^7$          | 18.7            | $2.9 \times 10^3$   |
| LOT 4 <sup>g</sup>                  |           |                         | Low speed                                    | $3.6 \times 10^7$          | 16.1            | $2.2 \times 10^3$   |
| LOT 5 <sup>g</sup>                  |           |                         | Low speed                                    | $1.6 \times 10^8$          | 27.6            | $5.7 \times 10^3$   |
| LOT 6 <sup>h</sup>                  |           |                         | Low speed                                    | $2.0 \times 10^7$          | 17.2            | $1.2 \times 10^3$   |
| LOT 7 <sup>h</sup>                  |           |                         | Low speed                                    | $2.5 \times 10^7$          | 32.0            | $7.9 \times 10^2$   |
| LOT 8 <sup>h</sup>                  |           |                         | Low speed                                    | $2.0 \times 10^7$          | 17.7            | $1.1 \times 10^3$   |

<sup>a</sup> On CEM A3.01 cells

<sup>b</sup> Lots used for CB-derived hCD34+ transductions (Figure 1-2)

<sup>c</sup> Lots used for BM-derived hCD34+ transductions (Figure 1-2)

<sup>d</sup> Disposable two compartment bioreactor, CELLline AD1000 (Integra Bioscience, Zizers, Switzerland)

<sup>e</sup> 50,000 g at 4°C for 2 hours in a Beckman L-80 ultracentrifuge SW32Ti rotor (Beckman Coulter, Brea, CA)

<sup>f</sup> 3,000 g at 4°C for 16 hours in a Multifuge 32-R

<sup>g</sup> Lots used for small-scale T lymphocyte transductions (Figure 3-4-5)

<sup>h</sup> Lots used for large-scale T lymphocyte transductions (Figure 5)
